# Supplementary material for: First-Episode Services for Psychotic Disorders in the U.S. Public Sector: A Pragmatic Randomized Controlled Trial
Source: Atypon-hosted journal article supplement (doi:10.1176/appi.ps.201400236), 2015-02-02
Supplement: appi.ps.201400236.ds001.pdf [file appi.ps.201400236.ds001.pdf]

# Supplementary Figure

## Figure S1: Patient Flow

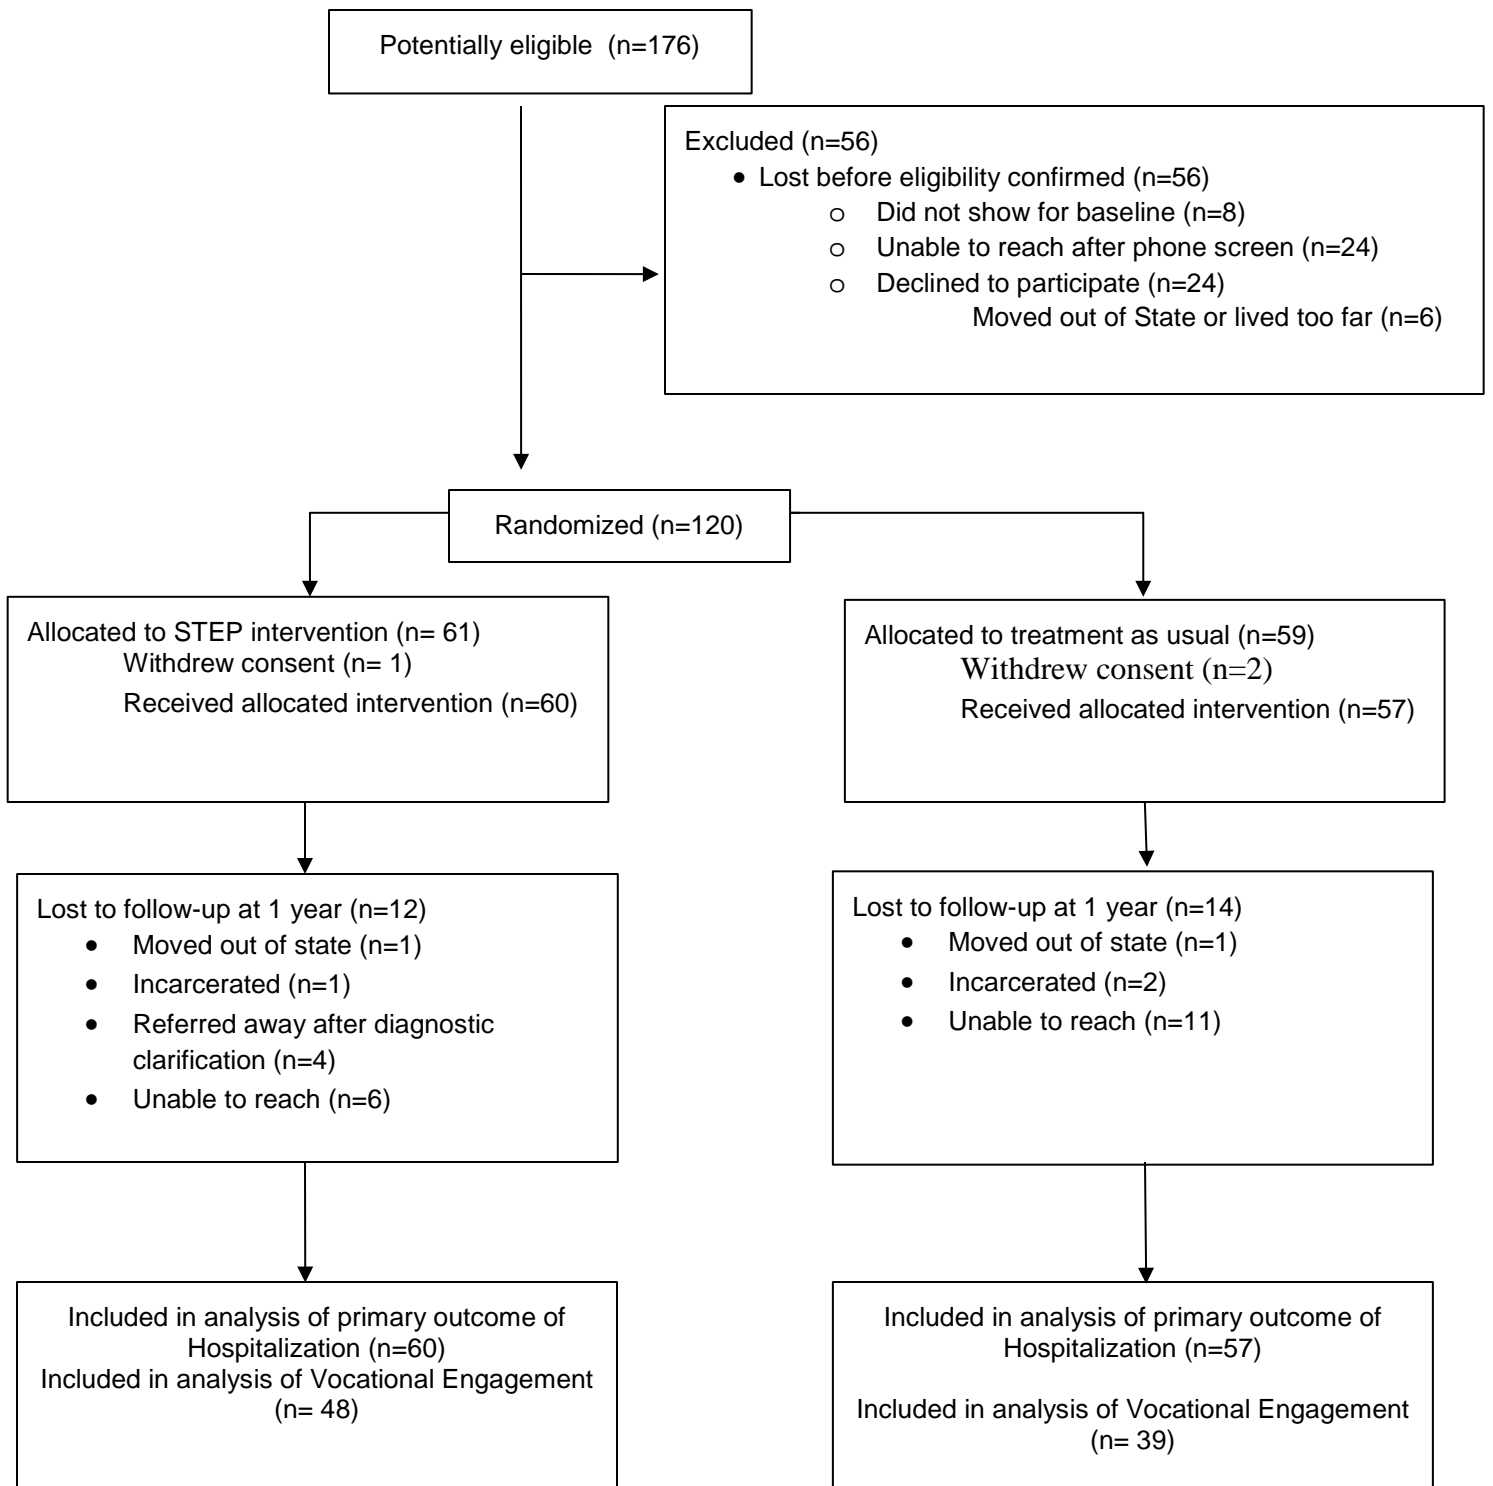

## Supplementary Tables

### S1: Proportion of YPH hospitalizations reported by patients/caregivers

YPH Hospitalizations (per patient/caregiver reports\*)/ YPH hospitalizations (from all sources)

Baseline:

STEP: 42/44 (95.4%)

USUAL TREATMENT: 39/43 (90.7%)

TOTAL: 81/87 (93.1%)

End of the follow-up:

STEP: 6/15 (40%)

USUAL TREATMENT: 12/19 (63.1%)

TOTAL: 18/34 (52.9%)

(\*included medical records patients/caregivers brought with them when available)

### S2: Proportion of hospitalizations that occurred at YPH based on patient /caregiver report

YPH Hospitalizations (per patient/caregiver reports\*)/ Total # of hospitalizations (just SURF + phone follow-up data were used)

Baseline:

STEP: 42/51 (82.3%)

USUAL TREATMENT: 39/45 (86.6%)

TOTAL: 81/96 (84.3%)

End of the follow-up:

STEP: 6/8 (75%)

USUAL TREATMENT: 12/20 (60%)

TOTAL: 18/28 (64.2%)

(\*included medical records patients/caregivers brought with them when available)

### S3: Distribution of hospitalizations at one year

|                  | <b>STEP<br/>(n=60)</b> | <b>USUAL<br/>TREATMENT<br/>(n=57)</b> |
|------------------|------------------------|---------------------------------------|
|                  | <b>n (%)</b>           | <b>n (%)</b>                          |
| Not hospitalized | 46 (77)                | 32 (56)                               |
| 1 time           | 10 (16.6)              | 14 (24.5)                             |
| 2 times          | 2 (3.3)                | 9 (15.7)                              |
| 3 times          | 2 (3.3)                | 1 (1.7)                               |

|                |       |         |
|----------------|-------|---------|
| $\geq 4$ times | 0 (0) | 1 (1.7) |
|----------------|-------|---------|

**S4: Testing LOCF assumption for vocational engagement**

|                               |     | Employed or school 6-12 months |            |
|-------------------------------|-----|--------------------------------|------------|
|                               |     | Yes                            | No         |
| Employed or school 0-6 months | Yes | 38 (92.7%)                     | 3 (7.3%)   |
|                               | No  | 4 (18.2%)                      | 18 (81.8%) |

**S5: Treatment Utilization – number of healthcare visits over first year**

| Professional type | STEP (n=60) | USUAL TREATMENT (n=57) |
|-------------------|-------------|------------------------|
| Psychiatrist      | 276         | 142                    |
| Clinician         | 825         | 543                    |
| Visiting Nurse    | 556         | 392                    |
| TOTAL             | 1657        | 1077                   |
